# Supplementary material
Source: PubMed Central journal article supplement (PMC4871789)
Supplement: NIHMS778221-supplement-Supporting.pdf [file NIHMS778221-supplement-Supporting.pdf]

## Supporting Information

### Suppression of Cocaine-evoked Hyperactivity by Self-adjuvanting and Multivalent Peptide Nanofiber Vaccines

Jai S. Rudra<sup>†,‡,§,\*</sup>, Ye Ding<sup>†,‡</sup>, Harshini Neelakantan<sup>†,‡</sup>, Chunyong Ding<sup>†</sup>, Rajagopal Appavu<sup>†</sup>, Sonja Stutz<sup>†</sup>, Joshua D. Snook<sup>†</sup>, Haiying Chen<sup>†</sup>, Kathryn A. Cunningham<sup>†,§,\*</sup>, and Jia Zhou<sup>†,\*</sup>

<sup>†</sup>Department of Pharmacology & Toxicology and Center for Addiction Research, <sup>§</sup>Sealy Center for Vaccine Development, University of Texas Medical Branch, 301 University Blvd, Galveston, Texas 77555, United States

**Figure S1**

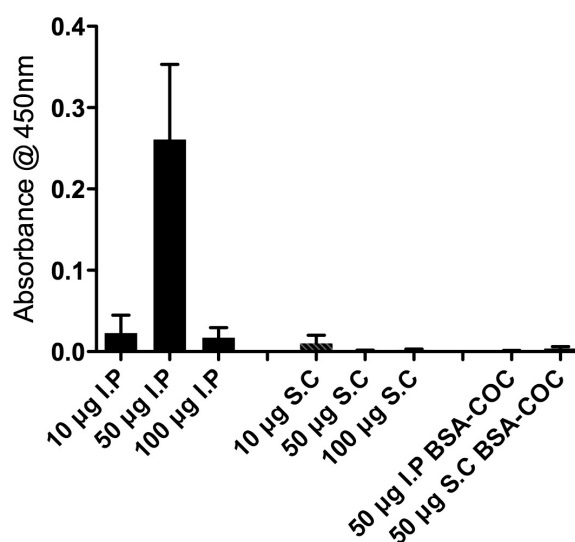

**Figure S1.** Dose and route dependence of antibody responses in mice vaccinated CocKFE8 nanofibers. 50 µg of CocKFE8 nanofibers delivered via the IP route elicited best antibody responses compared to other routes and doses. Cocaine-BSA conjugates delivered through both IP and SC routes without added adjuvants failed to induce anti-cocaine antibodies.

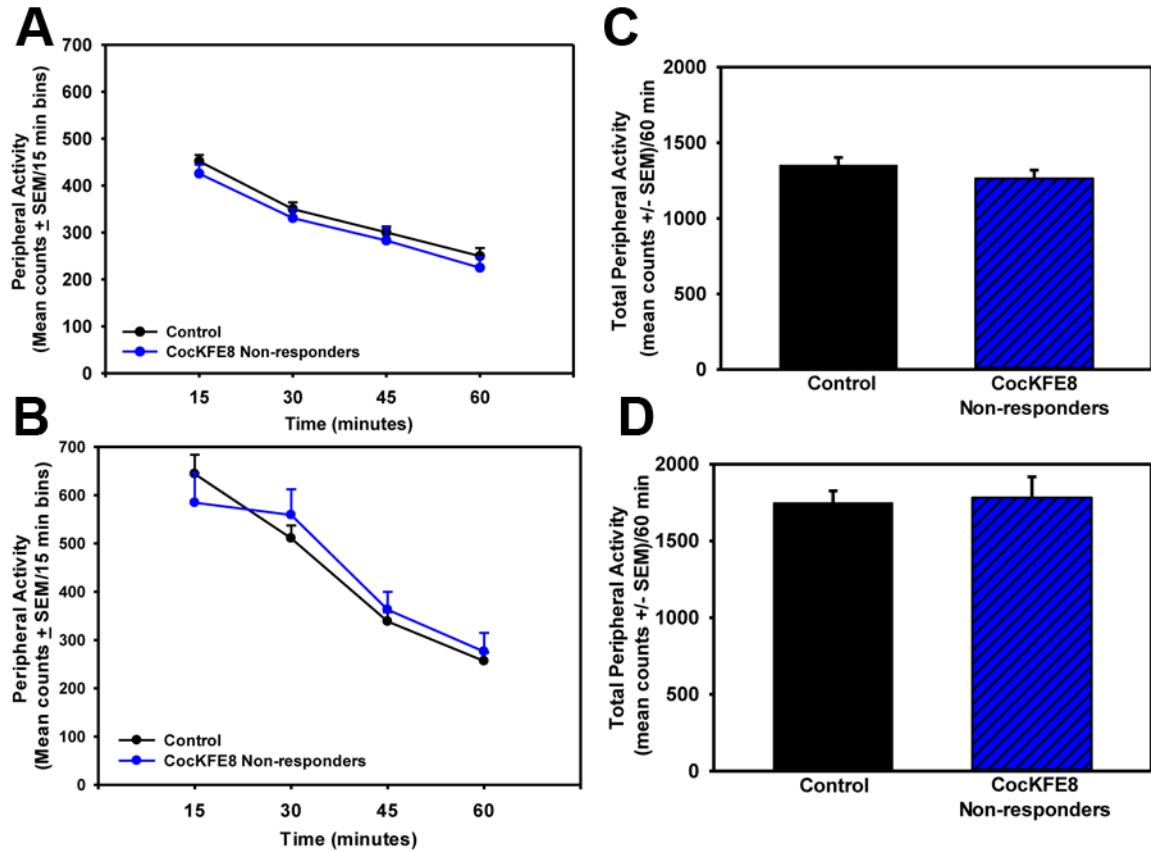

**Figure S2.** The total peripheral activity divided into 15 min bins (A) and mean total (counts/60 min) ( $\pm$  SEM) (B) for spontaneous locomotor activity in control and vaccinated CocKFE8 non-responder mice. The total peripheral activity divided into 15 min bins (C) and mean total (counts/60 min) ( $\pm$  SEM) (D) for cocaine-evoked locomotor activity in control and vaccinated CocKFE8 non-responder mice. Vaccinated mice defined as “CocKFE8 non-responders” did not differ significantly in spontaneous and cocaine-evoked locomotor activity relative to controls ( $p > 0.05$ , n.s.).
